# Supplementary material for: The Association between Prenatal Exposure to Per- and Polyfluoroalkyl Substances and Respiratory Tract Infections in Preschool Children: A Wuhan Cohort Study
Source: MDPI journal article supplement (doi:10.3390/toxics11110897), 2023-11-02
Supplement: s1 [file s1]

**Table S1.** Names, chemical formulas, and molecular structures of target compounds.

| Abbreviation |                                                 | Full name                     | CAS number | Chemical formula                                    |
|--------------|-------------------------------------------------|-------------------------------|------------|-----------------------------------------------------|
| PFOA         |                                                 | perfluorooctanoic acid        | 335-67-1   | C <sub>8</sub> HF <sub>15</sub> O <sub>2</sub>      |
| PFNA         |                                                 | perfluorononanoic acid        | 375-95-1   | C <sub>9</sub> HF <sub>17</sub> O <sub>2</sub>      |
| PFDA         |                                                 | perfluorodecanoic acid        | 335-76-2   | C <sub>10</sub> HF <sub>19</sub> O <sub>2</sub>     |
| PFUnDA       |                                                 | perfluoroundecanoic acid      | 2058-94-8  | C <sub>11</sub> HF <sub>21</sub> O <sub>2</sub>     |
| PFDoDA       |                                                 | perfluorododecanoic acid      | 307-55-1   | C <sub>12</sub> HF <sub>23</sub> O <sub>2</sub>     |
| PFTrDA       |                                                 | perfluorotridecanoic acid     | 72629-94-8 | C <sub>13</sub> HF <sub>25</sub> O <sub>2</sub>     |
| PFHxS        |                                                 | perfluorohexane sulfonic acid | 355-46-4   | C <sub>6</sub> HF <sub>13</sub> O <sub>3</sub> S    |
| PFOS         |                                                 | perfluorooctane sulfonic acid | 1763-23-1  | C <sub>8</sub> HF <sub>17</sub> O <sub>3</sub> S    |
| 6:2 Cl-PFESA | 6:2 chlorinated polyfluorinated ether sulfonate |                               | 73606-19-6 | C <sub>8</sub> ClF <sub>16</sub> KO <sub>4</sub> S  |
| 8:2 Cl-PFESA | 8:2 chlorinated polyfluorinated ether sulfonate |                               | 83329-89-9 | C <sub>10</sub> ClF <sub>20</sub> KO <sub>4</sub> S |

**Table S2.** General demographic characteristics of pregnant women included in the study.

| Characteristics                             | Mean $\pm$ SD or n (%) |
|---------------------------------------------|------------------------|
| Maternal age at delivery, years             | 29.12 $\pm$ 3.14       |
| < 25                                        | 29 (5.50)              |
| 25 ~ 29                                     | 263 (49.91)            |
| $\geq 30$                                   | 235 (44.59)            |
| Pre-pregnancy BMI, kg/m <sup>2</sup>        | 20.64 $\pm$ 2.48       |
| Underweight (< 18.5)                        | 93 (17.65)             |
| Normal (18.5 ~ 23.9)                        | 380 (72.11)            |
| Overweight or obesity (> 24)                | 54 (10.10)             |
| Education status, years                     |                        |
| < 13                                        | 85 (16.13)             |
| 13                                          | 399 (75.71)            |
| > 13                                        | 43 (8.16)              |
| Annual household income, ten thousand yuan  |                        |
| < 10                                        | 331 (62.81)            |
| $\geq 10$                                   | 194 (36.81)            |
| Null                                        | 2 (0.38)               |
| Passive smoking during pregnancy (women)    |                        |
| Yes                                         | 143 (27.13)            |
| No                                          | 384 (72.87)            |
| Parity                                      |                        |
| Primiparous                                 | 478 (90.70)            |
| Multiparous                                 | 49 (9.30)              |
| Neonatal sex                                |                        |
| Boys                                        | 284 (53.89)            |
| Girls                                       | 243 (46.11)            |
| Gestational age at birth, weeks             | 39.32 $\pm$ 1.12       |
| Preterm birth (< 37)                        | 17 (3.23)              |
| Term birth (37 ~ 42)                        | 510 (96.77)            |
| Birth weight, kg                            | 3.34 $\pm$ 0.41        |
| Low birth weight (< 2.5)                    | 9 (1.71)               |
| Normal birth weight (2.5 ~ 4.0)             | 490 (92.98)            |
| Macrosomia (> 4.0)                          | 28 (5.31)              |
| Breastfeeding months, months                |                        |
| < 6                                         | 142 (26.94)            |
| $\geq 6$                                    | 347 (65.84)            |
| Null                                        | 38 (7.21)              |
| Passive smoking during pregnancy (children) |                        |
| Yes                                         | 252 (47.82)            |
| No                                          | 262 (49.72)            |
| Null                                        | 13 (2.47)              |

Abbreviation: SD, standard deviation; BMI, body mass index.

**Table S3.** Association between single PFASs and RTIs after excluding preterm birth, low birth weight, and macrosomia.

|                | Incidence <sup>a</sup> |       | Frequency <sup>b</sup>  |               |
|----------------|------------------------|-------|-------------------------|---------------|
|                | OR (95% CI)            | P     | $\beta$ (95% CI)        | P             |
| PFOA (ng/mL)   |                        |       |                         |               |
| Common cold    | 1.00 (0.65,1.54)       | 0.998 | -0.05 (-0.18,0.07)      | 0.394         |
| Bronchitis     | 1.15 (0.79,1.66)       | 0.469 | 0.12 (-0.09,0.33)       | 0.272         |
| Pneumonia      | 0.95 (0.55,1.64)       | 0.864 | -0.24 (-0.73,0.24)      | 0.330         |
| Tonsillitis    | 1.07 (0.69,1.67)       | 0.756 | -0.03 (-0.32,0.27)      | 0.859         |
| PFNA (ng/mL)   |                        |       |                         |               |
| Common cold    | 0.79 (0.55,1.13)       | 0.201 | -0.04 (-0.14,0.06)      | 0.448         |
| Bronchitis     | 1.07 (0.79,1.45)       | 0.650 | 0.01 (-0.17,0.19)       | 0.924         |
| Pneumonia      | 0.98 (0.63,1.52)       | 0.924 | -0.16 (-0.54,0.21)      | 0.388         |
| Tonsillitis    | 1.25 (0.87,1.80)       | 0.226 | 0.20 (-0.05,0.44)       | 0.115         |
| PFDA (ng/mL)   |                        |       |                         |               |
| Common cold    | 0.84 (0.63,1.13)       | 0.254 | 0.02 (-0.06,0.11)       | 0.582         |
| Bronchitis     | 1.00 (0.77,1.28)       | 0.970 | -0.03 (-0.18,0.11)      | 0.660         |
| Pneumonia      | 1.01 (0.70,1.46)       | 0.967 | -0.16 (-0.48,0.16)      | 0.314         |
| Tonsillitis    | 1.25 (0.92,1.69)       | 0.150 | <b>0.20 (0.00,0.40)</b> | <b>0.046*</b> |
| PFUnDA (ng/mL) |                        |       |                         |               |
| Common cold    | 0.88 (0.64,1.21)       | 0.432 | 0.06 (-0.03,0.15)       | 0.194         |
| Bronchitis     | 1.00 (0.77,1.31)       | 0.976 | -0.02 (-0.18,0.14)      | 0.800         |
| Pneumonia      | 1.07 (0.72,1.59)       | 0.730 | -0.07 (-0.40,0.26)      | 0.684         |
| Tonsillitis    | 1.30 (0.94,1.79)       | 0.120 | <b>0.22 (0.00,0.44)</b> | <b>0.046*</b> |
| PFDoDA (ng/mL) |                        |       |                         |               |
| Common cold    | 0.99 (0.76,1.27)       | 0.914 | 0.07 (0.00,0.15)        | 0.052         |
| Bronchitis     | 1.01 (0.81,1.26)       | 0.936 | 0.00 (-0.12,0.12)       | 0.982         |
| Pneumonia      | 1.08 (0.78,1.49)       | 0.651 | 0.04 (-0.25,0.33)       | 0.811         |
| Tonsillitis    | 1.31 (1.00,1.72)       | 0.051 | <b>0.29 (0.11,0.47)</b> | <b>0.001*</b> |
| PFTrDA (ng/mL) |                        |       |                         |               |
| Common cold    | 0.99 (0.73,1.35)       | 0.959 | 0.08 (-0.01,0.18)       | 0.078         |
| Bronchitis     | 1.05 (0.80,1.38)       | 0.728 | 0.01 (-0.15,0.17)       | 0.889         |
| Pneumonia      | 1.05 (0.70,1.57)       | 0.807 | -0.03 (-0.37,0.32)      | 0.868         |
| Tonsillitis    | 1.29 (0.93,1.78)       | 0.128 | 0.20 (-0.02,0.42)       | 0.071         |
| PFHxS (ng/mL)  |                        |       |                         |               |
| Common cold    | 1.11 (0.80,1.53)       | 0.539 | -0.04 (-0.13,0.06)      | 0.442         |
| Bronchitis     | 1.04 (0.79,1.37)       | 0.773 | -0.09 (-0.25,0.07)      | 0.261         |
| Pneumonia      | 1.26 (0.84,1.87)       | 0.260 | 0.29 (-0.05,0.63)       | 0.099         |
| Tonsillitis    | 1.09 (0.79,1.51)       | 0.601 | 0.01 (-0.21,0.22)       | 0.962         |
| PFOS (ng/mL)   |                        |       |                         |               |
| Common cold    | 0.95 (0.76,1.19)       | 0.661 | -0.01 (-0.07,0.05)      | 0.768         |
| Bronchitis     | 0.97 (0.80,1.18)       | 0.772 | -0.09 (-0.20,0.02)      | 0.106         |
| Pneumonia      | 1.08 (0.82,1.42)       | 0.591 | -0.02 (-0.27,0.23)      | 0.887         |
| Tonsillitis    | 0.98 (0.78,1.24)       | 0.891 | -0.02 (-0.17,0.13)      | 0.792         |

|                      | Incidence <sup>a</sup> |          | Frequency <sup>b</sup>  |               |
|----------------------|------------------------|----------|-------------------------|---------------|
|                      | OR (95% CI)            | <i>P</i> | $\beta$ (95% CI)        | <i>P</i>      |
| 6:2 Cl-PFESA (ng/mL) |                        |          |                         |               |
| Common cold          | 0.98 (0.76,1.25)       | 0.861    | 0.01 (-0.06,0.08)       | 0.765         |
| Bronchitis           | 1.06 (0.85,1.31)       | 0.602    | 0.05 (-0.08,0.17)       | 0.457         |
| Pneumonia            | 1.06 (0.78,1.45)       | 0.711    | -0.12 (-0.39,0.15)      | 0.380         |
| Tonsillitis          | 1.16 (0.90,1.50)       | 0.243    | 0.14 (-0.03,0.31)       | 0.098         |
| 8:2 Cl-PFESA (ng/mL) |                        |          |                         |               |
| Common cold          | 0.92 (0.74,1.14)       | 0.442    | 0.01 (-0.06,0.07)       | 0.834         |
| Bronchitis           | 1.06 (0.88,1.28)       | 0.542    | 0.01 (-0.10,0.11)       | 0.916         |
| Pneumonia            | 1.04 (0.79,1.36)       | 0.806    | -0.15 (-0.41,0.11)      | 0.250         |
| Tonsillitis          | 1.14 (0.91,1.43)       | 0.250    | <b>0.19 (0.05,0.33)</b> | <b>0.008*</b> |

Abbreviation: OR, odds ratio; CI, confidence interval. The model was adjusted for maternal age (continuous variable), family annual income (< 100,000 yuan;  $\geq$  100,000 yuan), child sex (male; female), gestational week (continuous variable), parity (primipara; multipara), breastfeeding duration (< 6 months;  $\geq$  6 months), and child exposure to passive smoking (yes; no). These potential confounders were adjusted for in the regression model. \*:  $P < 0.05$ . <sup>a</sup> Logistic regression. <sup>b</sup> Poisson regression.

**Table S4.** Association between single PFASs and the incidence of RTIs in the study population stratified by sex.

|                | Boys             |          | Girls            |          | <i>P</i> <sub>interaction</sub> |
|----------------|------------------|----------|------------------|----------|---------------------------------|
|                | OR (95% CI)      | <i>P</i> | OR (95% CI)      | <i>P</i> |                                 |
| PFOA (ng/mL)   |                  |          |                  |          |                                 |
| Common cold    | 0.80 (0.48,1.34) | 0.405    | 1.72 (0.92,3.19) | 0.087    | 0.078                           |
| Bronchitis     | 1.04 (0.67,1.61) | 0.870    | 1.10 (0.64,1.90) | 0.725    | 0.763                           |
| Pneumonia      | 1.22 (0.64,2.33) | 0.543    | 0.51 (0.23,1.15) | 0.105    | 0.087                           |
| Tonsillitis    | 0.80 (0.46,1.37) | 0.414    | 1.74 (0.89,3.38) | 0.104    | 0.083                           |
| PFNA (ng/mL)   |                  |          |                  |          |                                 |
| Common cold    | 0.71 (0.44,1.13) | 0.145    | 1.00 (0.59,1.71) | 0.995    | 0.307                           |
| Bronchitis     | 1.00 (0.69,1.46) | 0.993    | 1.18 (0.74,1.90) | 0.482    | 0.619                           |
| Pneumonia      | 1.03 (0.59,1.79) | 0.916    | 0.75 (0.38,1.48) | 0.406    | 0.381                           |
| Tonsillitis    | 1.26 (0.81,1.98) | 0.306    | 1.48 (0.84,2.59) | 0.176    | 0.461                           |
| PFDA (ng/mL)   |                  |          |                  |          |                                 |
| Common cold    | 0.76 (0.52,1.13) | 0.175    | 1.01 (0.65,1.56) | 0.969    | 0.322                           |
| Bronchitis     | 0.99 (0.72,1.36) | 0.952    | 1.08 (0.73,1.59) | 0.712    | 0.916                           |
| Pneumonia      | 1.08 (0.67,1.74) | 0.750    | 0.80 (0.46,1.40) | 0.439    | 0.316                           |
| Tonsillitis    | 1.34 (0.91,1.99) | 0.138    | 1.25 (0.78,1.99) | 0.357    | 0.979                           |
| PFUnDA (ng/mL) |                  |          |                  |          |                                 |
| Common cold    | 0.83 (0.55,1.25) | 0.374    | 1.03 (0.64,1.65) | 0.904    | 0.447                           |
| Bronchitis     | 0.98 (0.70,1.38) | 0.909    | 1.17 (0.77,1.78) | 0.466    | 0.697                           |
| Pneumonia      | 1.15 (0.69,1.94) | 0.585    | 0.85 (0.46,1.54) | 0.589    | 0.366                           |
| Tonsillitis    | 1.21 (0.81,1.80) | 0.361    | 1.49 (0.89,2.47) | 0.127    | 0.454                           |
| PFDoDA (ng/mL) |                  |          |                  |          |                                 |
| Common cold    | 1.03 (0.73,1.44) | 0.874    | 1.03 (0.72,1.47) | 0.870    | 0.948                           |
| Bronchitis     | 1.07 (0.80,1.44) | 0.653    | 1.00 (0.73,1.37) | 0.991    | 0.566                           |
| Pneumonia      | 1.26 (0.80,1.98) | 0.325    | 0.85 (0.54,1.32) | 0.463    | 0.203                           |
| Tonsillitis    | 1.32 (0.93,1.90) | 0.124    | 1.36 (0.91,2.02) | 0.133    | 0.906                           |
| PFTrDA (ng/mL) |                  |          |                  |          |                                 |
| Common cold    | 1.10 (0.74,1.65) | 0.627    | 0.98 (0.62,1.55) | 0.926    | 0.802                           |
| Bronchitis     | 1.19 (0.83,1.70) | 0.350    | 1.10 (0.73,1.64) | 0.658    | 0.665                           |
| Pneumonia      | 1.20 (0.69,2.11) | 0.517    | 0.94 (0.53,1.67) | 0.834    | 0.612                           |
| Tonsillitis    | 1.21 (0.80,1.84) | 0.374    | 1.46 (0.89,2.40) | 0.137    | 0.460                           |
| PFHxS (ng/mL)  |                  |          |                  |          |                                 |
| Common cold    | 0.83 (0.55,1.24) | 0.362    | 1.46 (0.91,2.35) | 0.116    | 0.066                           |
| Bronchitis     | 0.91 (0.64,1.29) | 0.599    | 1.21 (0.84,1.75) | 0.301    | 0.264                           |
| Pneumonia      | 1.29 (0.78,2.14) | 0.324    | 0.95 (0.58,1.56) | 0.850    | 0.320                           |
| Tonsillitis    | 1.09 (0.72,1.65) | 0.691    | 1.05 (0.69,1.60) | 0.805    | 0.766                           |
| PFOS (ng/mL)   |                  |          |                  |          |                                 |
| Common cold    | 0.87 (0.66,1.15) | 0.341    | 1.08 (0.78,1.51) | 0.635    | 0.287                           |
| Bronchitis     | 0.96 (0.76,1.22) | 0.747    | 1.02 (0.77,1.36) | 0.898    | 0.823                           |
| Pneumonia      | 1.00 (0.70,1.43) | 1.000    | 1.05 (0.72,1.55) | 0.787    | 0.911                           |
| Tonsillitis    | 1.04 (0.78,1.38) | 0.810    | 0.90 (0.63,1.28) | 0.560    | 0.837                           |

|                      | Boys             |          | Girls             |          | <i>P</i> <sub>interaction</sub> |
|----------------------|------------------|----------|-------------------|----------|---------------------------------|
|                      | OR (95% CI)      | <i>P</i> | OR (95% CI)       | <i>P</i> |                                 |
| 6:2 Cl-PFESA (ng/mL) |                  |          |                   |          |                                 |
| Common cold          | 1.04 (0.75,1.43) | 0.818    | 0.94 (0.66,1.34)  | 0.733    | 0.778                           |
| Bronchitis           | 1.11 (0.85,1.45) | 0.462    | 1.01 (0.73,1.41)  | 0.946    | 0.606                           |
| Pneumonia            | 1.03 (0.70,1.53) | 0.877    | 0.98 (0.61,1.58)  | 0.930    | 0.656                           |
| Tonsillitis          | 1.15 (0.84,1.59) | 0.390    | 1.19 (0.82,1.72)  | 0.369    | 0.612                           |
| 8:2 Cl-PFESA (ng/mL) |                  |          |                   |          |                                 |
| Common cold          | 1.04 (0.77,1.42) | 0.778    | 0.87(0.65, 1.18)  | 0.376    | 0.467                           |
| Bronchitis           | 1.01 (0.78,1.30) | 0.939    | 1.14(0.87, 1.49)  | 0.338    | 0.657                           |
| Pneumonia            | 1.10 (0.76,1.60) | 0.610    | 0.94 (0.64, 1.39) | 0.775    | 0.465                           |
| Tonsillitis          | 1.10 (0.81,1.49) | 0.539    | 1.11 (0.81, 1.52) | 0.526    | 0.818                           |

Abbreviation: OR, odds ratio; CI, confidence interval;  $P_{\text{interaction}}$ , the interaction between PFASs and sex. The figure shows the results of Logistic regression after correction for covariates. The model was adjusted for maternal age (continuous variable), family annual income (< 100,000 yuan;  $\geq$  100,000 yuan), child sex (male; female), gestational week (continuous variable), parity (primipara; multipara), breastfeeding duration (<6 months;  $\geq$ 6 months), and child exposure to passive smoking (yes; no). These potential confounders were adjusted for in the regression model.

**Table S5.** Association between single PFASs and the frequency of RTIs in the study population stratified by sex.

|                 | Boys                    |               | Girls                   |               | <i>P</i> <sub>interaction</sub> |
|-----------------|-------------------------|---------------|-------------------------|---------------|---------------------------------|
|                 | OR (95% CI)             | <i>P</i>      | OR (95% CI)             | <i>P</i>      |                                 |
| PFOA (ng/mL)    |                         |               |                         |               |                                 |
| Common cold     | -0.15 (-0.30,0.01)      | 0.060         | 0.12 (-0.05,0.29)       | 0.170         | 0.054                           |
| Bronchitis      | 0.02 (-0.23,0.26)       | 0.900         | 0.18 (-0.13,0.48)       | 0.256         | 0.571                           |
| Pneumonia       | -0.14 (-0.73,0.45)      | 0.647         | -0.58 (-1.26,0.09)      | 0.091         | 0.188                           |
| Tonsillitis     | -0.20 (-0.55,0.16)      | 0.274         | 0.29 (-0.13,0.71)       | 0.182         | 0.057                           |
| PFNA (ng/mL)    |                         |               |                         |               |                                 |
| Common cold     | -0.08 (-0.21,0.05)      | 0.238         | 0.02 (-0.12,0.16)       | 0.781         | 0.451                           |
| Bronchitis      | 0.00 (-0.22,0.22)       | 0.980         | 0.02 (-0.25,0.30)       | 0.864         | 0.74                            |
| Pneumonia       | -0.16 (-0.61,0.30)      | 0.505         | -0.29 (-0.91,0.32)      | 0.353         | 0.404                           |
| Tonsillitis     | 0.14 (-0.15,0.44)       | 0.341         | 0.34 (0.00,0.69)        | 0.051         | 0.121                           |
| PFDA (ng/mL)    |                         |               |                         |               |                                 |
| Common cold     | -0.02 (-0.13,0.09)      | 0.729         | 0.09 (-0.03,0.21)       | 0.152         | 0.327                           |
| Bronchitis      | -0.01 (-0.19,0.17)      | 0.884         | 0.03 (-0.19,0.24)       | 0.796         | 0.706                           |
| Pneumonia       | -0.10 (-0.51,0.30)      | 0.626         | -0.30 (-0.80,0.21)      | 0.248         | 0.252                           |
| Tonsillitis     | 0.16 (-0.09,0.40)       | 0.216         | <b>0.32 (0.03,0.62)</b> | <b>0.028*</b> | 0.246                           |
| PFUnDA (ng/mL)  |                         |               |                         |               |                                 |
| Common cold     | 0.02 (-0.10,0.14)       | 0.726         | 0.11 (-0.02,0.24)       | 0.085         | 0.516                           |
| Bronchitis      | 0.03 (-0.17,0.22)       | 0.802         | 0.02 (-0.21,0.25)       | 0.878         | 0.539                           |
| Pneumonia       | -0.06 (-0.49,0.36)      | 0.776         | -0.14 (-0.67,0.40)      | 0.621         | 0.497                           |
| Tonsillitis     | 0.08 (-0.19,0.35)       | 0.584         | <b>0.41 (0.10,0.73)</b> | <b>0.010*</b> | 0.068                           |
| PFDODA (ng/mL)  |                         |               |                         |               |                                 |
| Common cold     | 0.04 (-0.06,0.14)       | 0.390         | 0.09 (-0.01,0.19)       | 0.069         | 0.757                           |
| Bronchitis      | 0.07 (-0.09,0.24)       | 0.395         | -0.03 (-0.20,0.14)      | 0.743         | 0.244                           |
| Pneumonia       | 0.09 (-0.31,0.49)       | 0.664         | -0.07 (-0.46,0.32)      | 0.714         | 0.39                            |
| Tonsillitis     | <b>0.25 (0.02,0.48)</b> | <b>0.034*</b> | <b>0.34 (0.09,0.60)</b> | <b>0.008*</b> | 0.422                           |
| PFTTrDA (ng/mL) |                         |               |                         |               |                                 |
| Common cold     | 0.08 (-0.05,0.21)       | 0.211         | 0.09 (-0.03,0.22)       | 0.147         | 0.978                           |
| Bronchitis      | 0.15 (-0.07,0.36)       | 0.179         | -0.06 (-0.28,0.17)      | 0.634         | 0.161                           |
| Pneumonia       | 0.05 (-0.43,0.53)       | 0.842         | -0.09 (-0.60,0.41)      | 0.721         | 0.673                           |
| Tonsillitis     | 0.21 (-0.09,0.50)       | 0.17          | 0.23 (-0.09,0.54)       | 0.161         | 0.595                           |
| PFHxS (ng/mL)   |                         |               |                         |               |                                 |
| Common cold     | -0.06 (-0.18,0.06)      | 0.316         | -0.01 (-0.12,0.09)      | 0.790         | 0.644                           |
| Bronchitis      | -0.08 (-0.27,0.11)      | 0.411         | -0.03 (-0.23,0.18)      | 0.811         | 0.845                           |
| Pneumonia       | 0.26 (-0.15,0.68)       | 0.216         | 0.06 (-0.33,0.45)       | 0.763         | 0.268                           |
| Tonsillitis     | 0.07 (-0.20,0.34)       | 0.633         | -0.15(-0.44,0.15)       | 0.327         | 0.718                           |
| PFOS (ng/mL)    |                         |               |                         |               |                                 |
| Common cold     | -0.02 (-0.1,0.06)       | 0.62          | 0.00 (-0.09,0.08)       | 0.928         | 0.885                           |
| Bronchitis      | -0.06 (-0.19,0.08)      | 0.41          | -0.08 (-0.25,0.08)      | 0.336         | 0.497                           |
| Pneumonia       | -0.04 (-0.36,0.27)      | 0.795         | -0.03 (-0.38,0.32)      | 0.852         | 0.701                           |
| Tonsillitis     | 0.08 (-0.1,0.26)        | 0.365         | -0.19 (-0.43,0.05)      | 0.116         | 0.135                           |

|                      | Boys               |       | Girls              |       | $P_{\text{interaction}}$ |
|----------------------|--------------------|-------|--------------------|-------|--------------------------|
|                      | OR (95% CI)        | $P$   | OR (95% CI)        | $P$   |                          |
| 6:2 Cl-PFESA (ng/mL) |                    |       |                    |       |                          |
| Common cold          | 0.02 (-0.08,0.11)  | 0.737 | -0.01 (-0.11,0.09) | 0.836 | 0.501                    |
| Bronchitis           | 0.10 (-0.06,0.25)  | 0.214 | 0.01 (-0.18,0.19)  | 0.924 | 0.192                    |
| Pneumonia            | -0.11 (-0.44,0.23) | 0.531 | -0.19 (-0.62,0.25) | 0.404 | 0.328                    |
| Tonsillitis          | 0.09 (-0.12,0.31)  | 0.404 | 0.14 (-0.08,0.37)  | 0.212 | 0.268                    |
| 8:2 Cl-PFESA (ng/mL) |                    |       |                    |       |                          |
| Common cold          | 0.02 (-0.07,0.10)  | 0.692 | 0.00 (-0.09,0.08)  | 0.911 | 0.562                    |
| Bronchitis           | -0.01 (-0.15,0.13) | 0.918 | 0.05 (-0.10,0.20)  | 0.495 | 0.942                    |
| Pneumonia            | -0.14 (-0.47,0.20) | 0.422 | -0.12 (-0.47,0.23) | 0.505 | 0.744                    |
| Tonsillitis          | 0.10 (-0.09,0.29)  | 0.300 | 0.16 (-0.03,0.35)  | 0.103 | 0.482                    |

Abbreviation: OR, odds ratio; CI, confidence interval;  $P_{\text{interaction}}$ , the interaction between PFASs and sex. The figure shows the results of Poisson regression after correction for covariates. The model was adjusted for maternal age (continuous variable), family annual income (<100,000 yuan;  $\geq$ 100,000 yuan), child sex (male; female), gestational week (continuous variable), parity (primipara; multipara), breastfeeding duration (<6 months;  $\geq$ 6 months), and child exposure to passive smoking (yes; no). These potential confounders were adjusted for in the regression model.  $P_{\text{interaction}}$ : the interaction between PFASs and sex. \*:  $P < 0.05$ .



**Table S6.** Association between PFASs mixture and the incidence of RTIs based on Quantile g-computation analysis.

|             | OR (95% CI)       | <i>P</i> | The sum of the<br>positive association | The sum of the<br>negative association |
|-------------|-------------------|----------|----------------------------------------|----------------------------------------|
| Common cold | 0.03 (-0.26,0.31) | 0.860    | 0.411                                  | -0.386                                 |
| Bronchitis  | 0.00 (-0.24,0.24) | 0.987    | 0.603                                  | -0.601                                 |
| Pneumonia   | 0.14 (-0.21,0.49) | 0.430    | 0.518                                  | -0.378                                 |
| Tonsillitis | 0.10 (-0.19,0.39) | 0.493    | 0.792                                  | -0.691                                 |

Abbreviation: OR, odds ratio; CI, confidence interval. The model was adjusted for maternal age (continuous variable), family annual income (<100,000 yuan; ≥100,000 yuan), child sex (male; female), gestational week (continuous variable), parity (primipara; multipara), breastfeeding duration (<6 months; ≥6 months), and child exposure to passive smoking (yes; no). These potential confounders were adjusted for in the regression model.

**Table S7.** Association between PFASs mixture and the frequency of RTIs based on Quantile g-computation analysis.

|             | RR (95% CI)       | <i>P</i> | The sum of the<br>positive association | The sum of the<br>negative association |
|-------------|-------------------|----------|----------------------------------------|----------------------------------------|
| Common cold | 0.00 (-0.07,0.08) | 0.933    | 0.216                                  | -0.212                                 |
| Bronchitis  | -0.06 (0.20,0.07) | 0.331    | 0.358                                  | -0.425                                 |
| Pneumonia   | -0.02 (0.33,0.29) | 0.916    | 0.667                                  | -0.683                                 |
| Tonsillitis | 0.10 (-0.08,0.29) | 0.285    | 1.100                                  | -1.000                                 |

Abbreviation: RR, relative risk; CI, confidence interval. The model was adjusted for maternal age (continuous variable), family annual income (<100,000 yuan; ≥100,000 yuan), child sex (male; female), gestational week (continuous variable), parity (primipara; multipara), breastfeeding duration (<6 months; ≥6 months), and child exposure to passive smoking (yes; no). These potential confounders were adjusted for in the regression model.

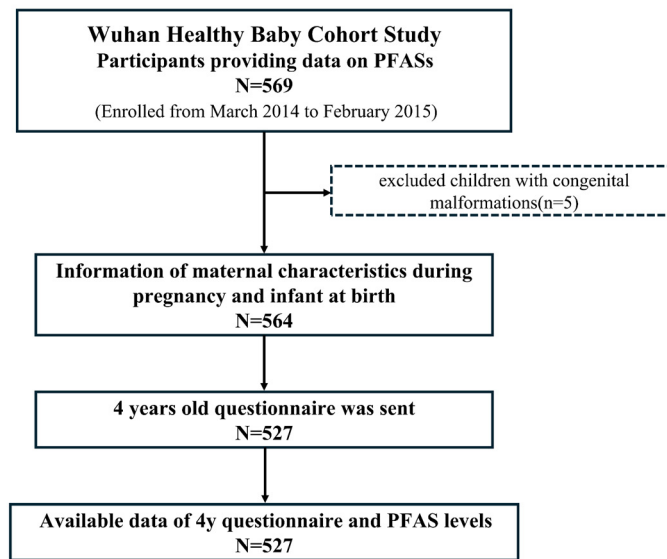

**Figure S1.** Number of observations at different stages of study.

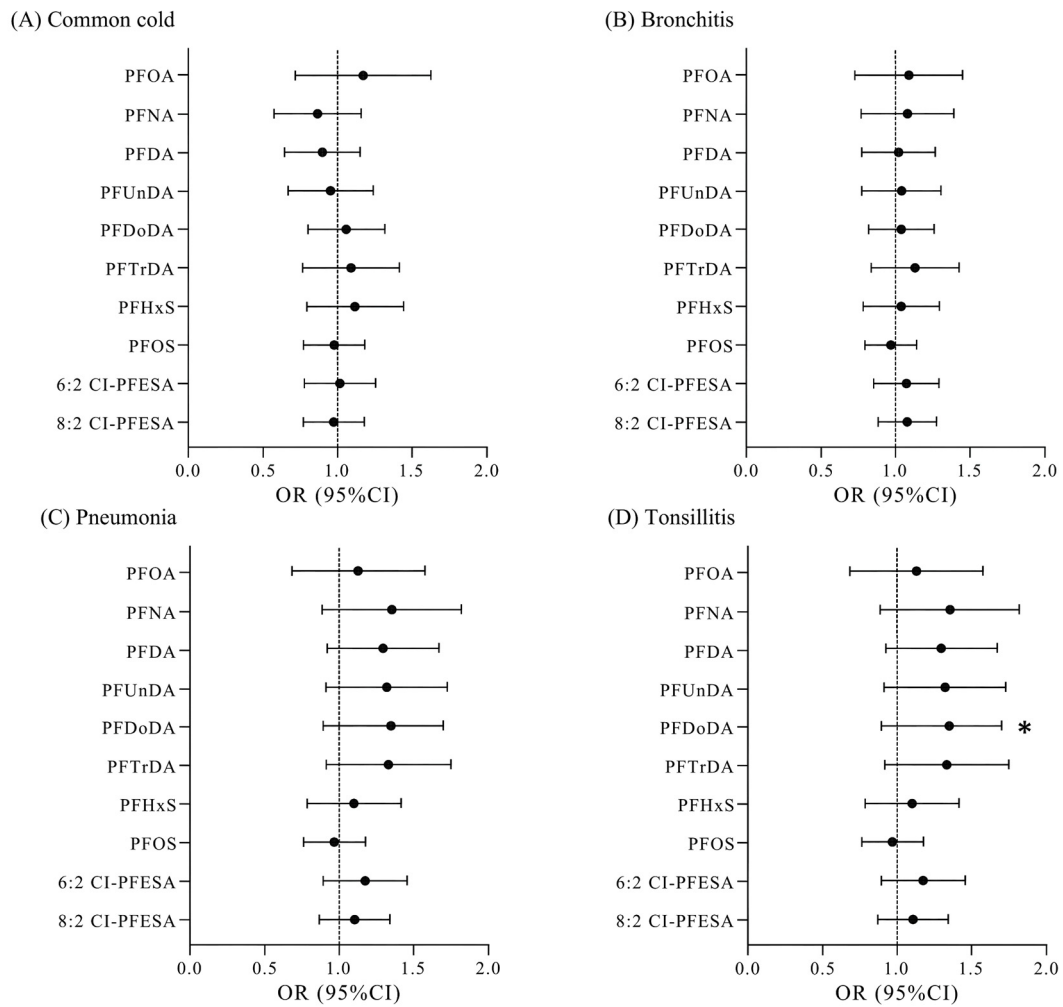

**Figure S2.** Association between single PFASs and the incidence of RTIs (PFASs as continuous variables). Abbreviation: OR, odds ratio; CI, confidence interval. The figure shows the results of Logistic regression after correction for covariates. The model was adjusted for maternal age (continuous variable), family annual income (<100,000 yuan;  $\geq$ 100,000 yuan), child sex (male; female), gestational week (continuous variable), parity (primipara; multipara), breastfeeding duration (<6 months;  $\geq$ 6 months), and child exposure to passive smoking (yes; no). These potential confounders were adjusted for in the regression model. \*:  $p < 0.05$

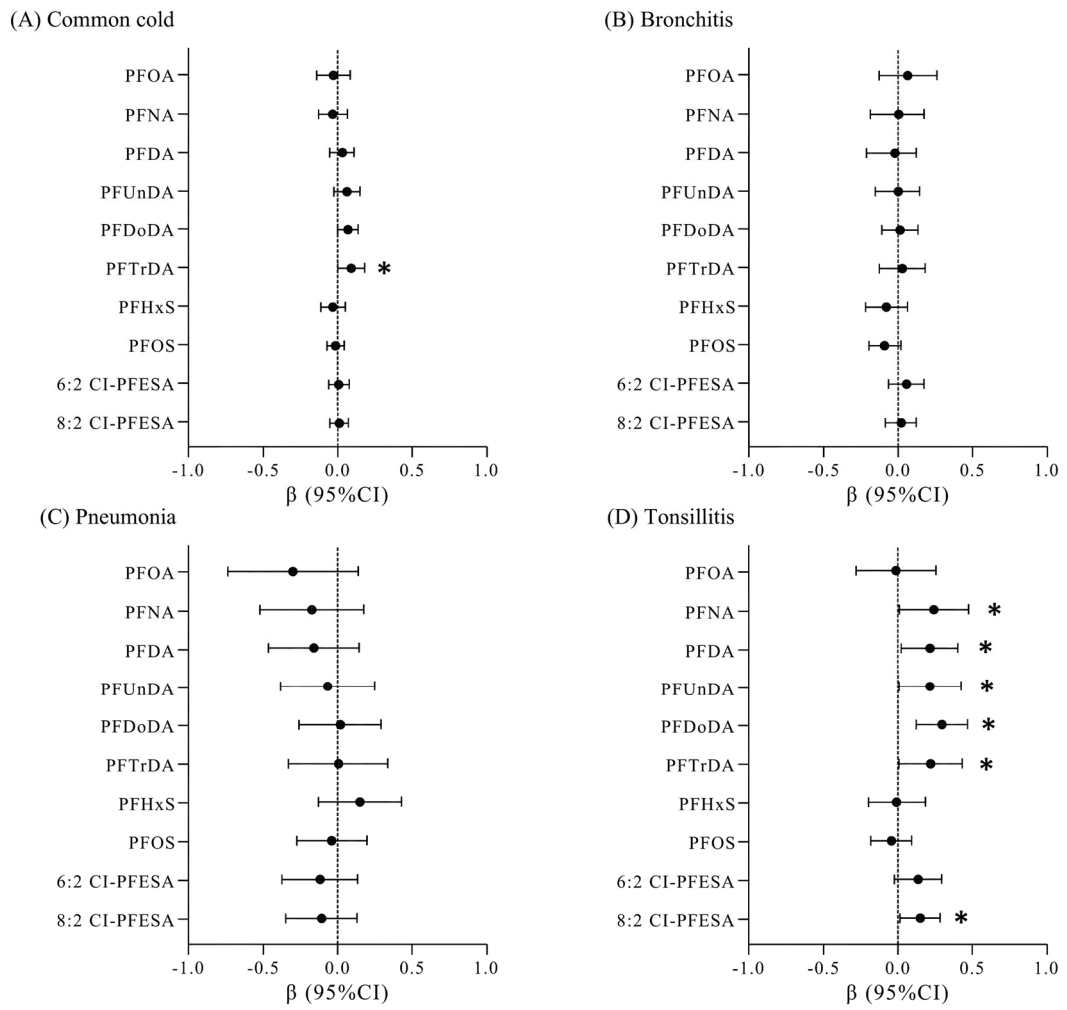

**Figure S3.** Association between single PFASs and the frequency of RTIs (PFASs as continuous variables). Abbreviation: CI, confidence interval. The figure shows the results of Poisson regression after correction for covariates. The model was adjusted for maternal age (continuous variable), family annual income (<100,000 yuan;  $\geq$ 100,000 yuan), child sex (male; female), gestational week (continuous variable), parity (primipara; multipara), breastfeeding duration (<6 months;  $\geq$ 6 months), and child exposure to passive smoking (yes; no). These potential confounders were adjusted for in the regression model. \*:  $p < 0.05$

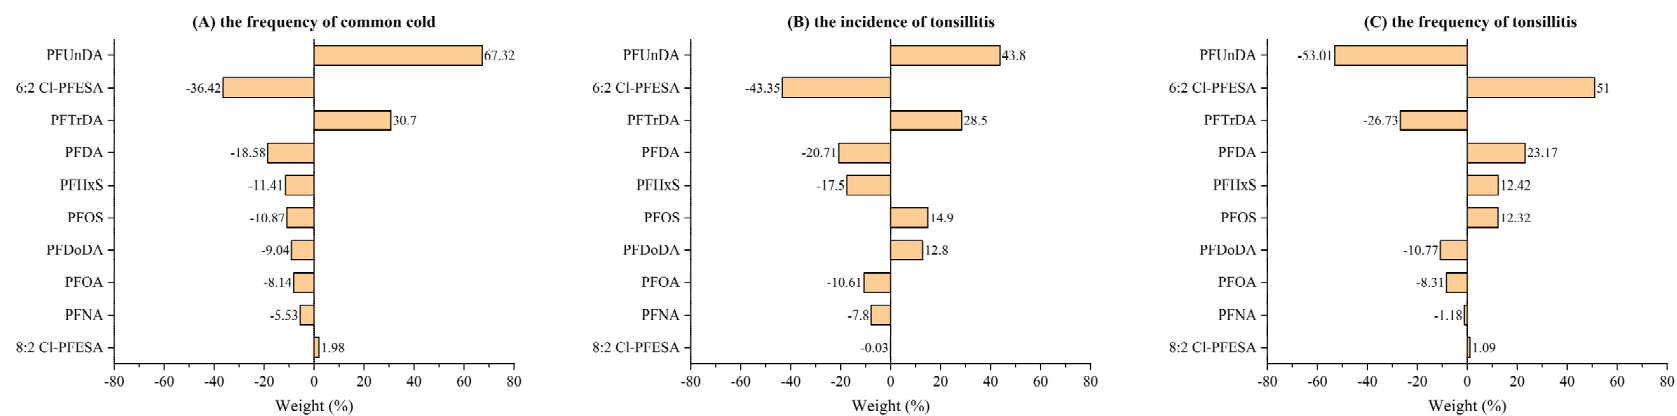

**Figure S4.** Weights of each single PFASs contributing to the association between PFASs mixture and RTIs. The figure shows the results of Quantile g-computation analysis.
